# Supplementary material for: An Interactive Global Health Study Builder Tool to Empower Frontline Healthcare Workers in Research Leadership
Source: Research Square preprint supplement (doi:10.21203/rs.3.rs-7903851/v1), 2025-12-11
Supplement: Supplementary file 1 [file 2c821146049d33b5a62599e4.xlsx]

## Sheet: Detail1
Details for Count of Sex - Sex: Female
Sex
Female
Female
Female
Female
Female
Female
Female
Female
Female
Female
Female
Female
Female
Female
Female
Female
Female
Female
Female
Female
Female
Female
Female
Female
Female
Female
Female
Female
Female
Female
Female
Female
Female
Female
Female

## Sheet: Sheet1
Initials	Response	Profession	Country	Sex	Theme
DM	Thank you for including me in this process. I like it very much	Nurse	Nigeria	Female	Commendation
MB	This is a good tool that will help many nurses.	Nurse	South Africa	Female	Commendation
LNA	I got stock at profile update, I click save many times but nothing happen.	Nurse	Sudan	Female	Navigation and Login
HB	very lovely intiative, we are waiting for the launch	Nurse	South Africa	Female	Commendation
AK	I think this approcah will help community health workers to do research.	Community Health Worker	Ethiopia	Female	Commendation
MB	I struggled to log in and set up the password, there are too many steps. Otherwise, I like the tool and I think it will help many young nurses to do research. I didn’t have this kind of privilege as a young nurse; I had to learn by myself.	Nurse	Kenya	Female	Navigation and Login
FT	I like that it is in English and French. But in our country maybe Swahili will be be very nice you know diploma nurses and even community healthcare workers. For me, it helped me and I will recommend it to my colleagues	Nurse	Tanzania	Female	Language Accessibility
CN	It makes research look so simple to me. It made research look less scary. The way the stages are explained makes it possible to start small small	Midwife	Nigeria	Female	Commendation
JR	We are happy to be part of the 1000 Challenge	Nurse	Tanzania	Female	Commendation
EK	When I tried with my phone it was not easy	Nurse	Ethiopia	Female	Navigation and Login
IM	I believe this thing will empower many of us and community healthcare workers. Content materials	Midwife	Ethiopia	Female	Commendation
YP	Honestly, this is a very good for us. Thank you.	Midwife	South Africa	Female	Commendation
GS	I struggled to log in and confirm my email, the steps are too many.	Nurse	Ghana	Male	Navigation and Login
LM	The registration steps were confusing until someone guided me.	Nurse	Sudan	Female	Onboarding Process
TO	The design is good but the colours look dull, maybe if it can be more bright it will attract more young people.	Nurse	Tanzania	Female	Visual Design
AW	The 1000 Challenge idea is very motivating	Nurse	Uganda	Female	Commendation
BD	This is a very useful tool for nurses who do not usually get mentorship.	Nurse	Malawi	Female	Commendation
CT	The email link did not work, I was stuck until a XXX from TGHN shared screen with me and showed me how	Nurse	Tanzania	Male	Navigation and Login
RA	The tool is very okay, but the internet in our rural setting makes it difficult.	Community Health Worker	Kenya	Male	Language Accessibility
ZS	It is simple and practical, I will recommend it to my colleagues.	Community Health Worker	Nigeria	Female	Commendation
OM	The interface could be more user-friendly and modern.	Nurse	Tanzania	Female	Visual Design
LN	I struggled to follow the process explained in the email until someone helped me. Can you put a video to explain the registration process?	Midwife	Malawi	Male	Navigation and Login
SN	I believe this tool will empower many community healthcare workers.	Nurse	Ethiopia	Female	Commendation
AD	I could not update my profile without assistance from TGHN staff.	Nurse	Sudan	Female	Navigation and Login
KU	I love how the examples are based in real world. Not just theory. It is practical, not like what we learn in school	Midwife	Nigeria	Female	Commendation
VI	The resources are useful.	Nurse	Uganda	Female	Commendation
HB	The resources in it are quite useful but the thing itself doesn’t look attractive.	Pharmacist	Sudan	Female	Visual Design
JN	This is a good tool that will help many nurses.	Nurse	Ethiopia	Male	Commendation
HT	After doing the 1000 Challenge, I think I can do my own research now	Community Health Worker	Ethiopia	Female	Commendation
QA	Excellent work, clear, and structured. I did not face any difficulty	Pharmacist	Ghana	Female	Commendation
RWT	I like inviting my colleague to join and working and comment together. But too many clicks before starting.	Midwife	Ethiopia	Female	Navigation and Login
LE	The registration steps were confusing until someone guided me.	Lab Staff	Ethiopia	Female	Onboarding Process
UF	We need translation in Portuguese for more nurses in Brazil. Very Good	Midwife	Brazil	Female	Language Accessibility
KG	This is good enough. The spanis and portuguese options are very useful for us in Latin America	Nurse	Peru	Female	Commendation
DM	This is a good tool that will help lots (of) nurses. The resources need to be made available in Latin American languages and maybe a short video explaining the process could help nurses understand the process better.	Midwife	Argentina	Female	Language Accessibility
TM	This is a very useful tool for nurses who do not usually get mentorship.	Pharmacist	Argentina	Male	Commendation
SI	I could not update my profile without assistance from TGHN staff.	Community Health Worker	Bangladesh	Male	Navigation and Login
AZ	Logging in was a bit stressfull, the email link did not open until after two tries.	Lab Staff	Brazil	Female	Navigation and Login
JD	We like it very much	Community Health Worker	Philippines	Female	Commendation
PF	Maybe it will help our colleagues to develop confidence to do research. Please keep it free.	Pharmacist	Philippines	Female	Commendation
BT	I struggled to log in and confirm my email, the steps are too many.	Nurse	Nepal	Female	Navigation and Login
GV	I will say kudos to GRN for this work. The 1000 challnge help me to see resarch as a simple something	Nurse	India	Female	Commendation
OH	No problem	Nurse	India	Male	Commendation
MSP	I could not update my profile without assistance from TGHN staff.	Pharmacist	Nepal	Female	Navigation and Login
